# Supplementary material
Source: PubMed Central journal article supplement (PMC5602385)
Supplement: 10.1074_M117.789867_jbc.M117.789867-1.pdf [file 10.1074_M117.789867_jbc.M117.789867-1.pdf]

## **SUPPLEMENTAL DATA**

The exocyst subunit Sec3 is regulated by a protein quality control pathway

Caroline Kampmeyer, Antonina Karakostova, Signe M. Schenstrøm,  
Amanda B. Abildgaard, Anne-Marie Lauridsen, Isabelle Jourdain and Rasmus Hartmann-Petersen

### *Material included:*

Supplemental Figure S1, Phenotypes of the double mutants

Supplemental Table S1, Fission yeast strains used in this study

Supplemental references, References for supplemental Table S1

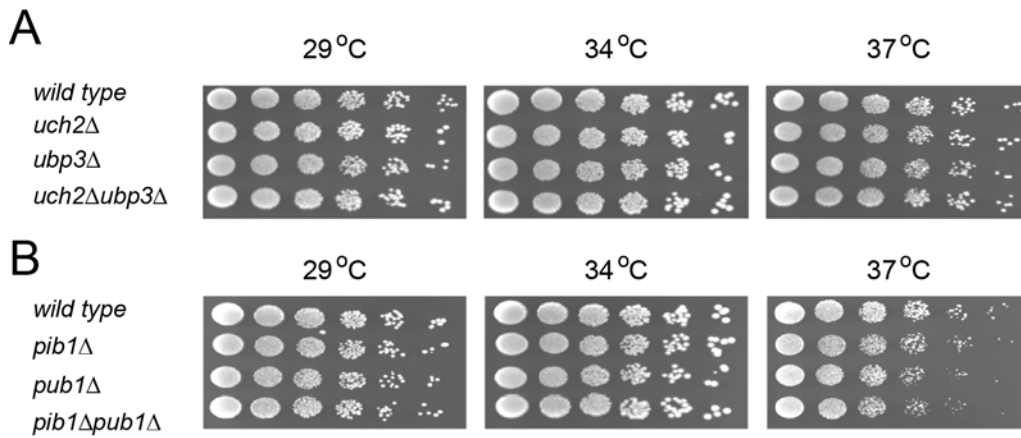

**FIGURE S1.** Phenotypes of the double mutants. (A) The growth on rich media of wild type, *uch2Δ*, *ubp3Δ* and *uch2Δubp3Δ* double mutant was compared at the indicated temperatures. (B) The growth on rich media of wild type, *pib1Δ*, *pub1Δ* and *pib1Δpub1Δ* double mutant was compared at the indicated temperatures.

**Table S1***Fission yeast strains used in this study*

| Strain                 | Genotype                                                     | Reference  |
|------------------------|--------------------------------------------------------------|------------|
| <i>wild type</i>       | <i>leu1-32 ura4-D18 ade6</i>                                 | Lab. stock |
| <i>sec3-V5</i>         | <i>sec3-V5(::G418), leu1-32 ura4-D18 ade6</i>                | (1)        |
| <i>sec3-913-V5</i>     | <i>sec3-913-V5(::G418) leu1-32 ura4-D18 ade6</i>             | (1)        |
| <i>sec3-V5</i>         | <i>sec3-V5(::NAT), leu1-32 ura4-D18 ade6</i>                 | This study |
| <i>sec3-913-V5</i>     | <i>sec3-913-V5(::NAT) leu1-32 ura4-D18 ade6</i>              | This study |
| <i>nmt1-sec3</i>       | <i>nmt1-sec3-GFP (::G418) leu1-32 ura4-D18 ade6</i>          | (1)        |
| <i>nmt1-sec3-913</i>   | <i>nmt1-sec3-913-GFP (::G418) leu1-32 ura4-D18 ade6</i>      | (1)        |
| <i>nas6Δ</i>           | <i>nas6::G418 leu1-32 ura4-D18 ade6</i>                      | (2)        |
| <i>dss1Δ</i>           | <i>dss1::G418 leu1-32 ura4-D18 ade6</i>                      | (3)        |
| <i>sks2Δ</i>           | <i>sks2::ura4 leu1-32 ura4-D18 ade6</i>                      | This study |
| <i>ssa1Δ</i>           | <i>ssa1::G418 leu1-32 ura4-D18 ade6</i>                      | (4)        |
| <i>ssa2Δ</i>           | <i>ssa2::ura4 leu1-32 ura4-D18 ade6</i>                      | This study |
| <i>hsp104Δ</i>         | <i>hsp104::G418 leu1-32 ura4-D18 ade6</i>                    | (4)        |
| <i>cdc48-G338D</i>     | <i>cdc48-G338D leu1-32 ura4-D18 ade6</i>                     | (5)        |
| <i>san1Δ</i>           | <i>san1::G418 leu1-32 ura4-D18 ade6</i>                      | (2)        |
| <i>hul5Δ</i>           | <i>hul5::G418 leu1-32 ura4-D18 ade6</i>                      | (4)        |
| <i>doa10Δ</i>          | <i>doa10::G418 leu1-32 ura4-D18 ade6</i>                     | (4)        |
| <i>ltn1Δ</i>           | <i>ltn1::G418 leu1-32 ura4-D18 ade6</i>                      | (4)        |
| <i>pub1Δ</i>           | <i>pub1::G418 leu1-32 ura4-D18 ade6</i>                      | (4)        |
| <i>pub2Δ</i>           | <i>pub2::G418 leu1-32 ura4-D18 ade6</i>                      | (4)        |
| <i>pub3Δ</i>           | <i>pub3::G418 leu1-32 ura4-D18 ade6</i>                      | (4)        |
| <i>pib1Δ</i>           | <i>pib1::G418 leu1-32 ura4-D18 ade6</i>                      | (4)        |
| <i>ubp2Δ</i>           | <i>ubp2::G418 leu1-32 ura4-D18 ade6</i>                      | (4)        |
| <i>ubp3Δ</i>           | <i>ubp3::G418 leu1-32 ura4-D18 ade6</i>                      | (2)        |
| <i>ubp6Δ</i>           | <i>ubp6::G418 leu1-32 ura4-D18 ade6</i>                      | (4)        |
| <i>uch2Δ</i>           | <i>uch2::G418 leu1-32 ura4-D18 ade6</i>                      | (6)        |
| <i>sec3-913nas6Δ</i>   | <i>sec3-913-V5(::NAT) nas6::G418 leu1-32 ura4-D18 ade6</i>   | This study |
| <i>sec3-913dss1Δ</i>   | <i>sec3-913-V5(::NAT) dss1::G418 leu1-32 ura4-D18 ade6</i>   | This study |
| <i>sec3-913sks2Δ</i>   | <i>sec3-913-V5(::NAT) sks2::ura4 leu1-32 ura4-D18 ade6</i>   | This study |
| <i>sec3-913ssa1Δ</i>   | <i>sec3-913-V5(::NAT) ssa1::G418 leu1-32 ura4-D18 ade6</i>   | This study |
| <i>sec3-913ssa2Δ</i>   | <i>sec3-913-V5(::NAT) ssa2::ura4 leu1-32 ura4-D18 ade6</i>   | This study |
| <i>sec3-913hsp104Δ</i> | <i>sec3-913-V5(::NAT) hsp104::G418 leu1-32 ura4-D18 ade6</i> | This study |
| <i>sec3-913cdc48</i>   | <i>sec3-913-V5(::NAT) cdc48-G338D leu1-32 ura4-D18 ade6</i>  | This study |
| <i>sec3-913san1Δ</i>   | <i>sec3-913-V5(::NAT) san1::G418 leu1-32 ura4-D18 ade6</i>   | This study |
| <i>sec3-913hul5Δ</i>   | <i>sec3-913-V5(::NAT) hul5::G418 leu1-32 ura4-D18 ade6</i>   | This study |
| <i>sec3-913doa10Δ</i>  | <i>sec3-913-V5(::NAT) doa10::G418 leu1-32 ura4-D18 ade6</i>  | This study |
| <i>sec3-913ltn1Δ</i>   | <i>sec3-913-V5(::NAT) ltn1::G418 leu1-32 ura4-D18 ade6</i>   | This study |
| <i>sec3-913pub1Δ</i>   | <i>sec3-913-V5(::NAT) pub1::G418 leu1-32 ura4-D18 ade6</i>   | This study |
| <i>sec3-913pub2Δ</i>   | <i>sec3-913-V5(::NAT) pub2::G418 leu1-32 ura4-D18 ade6</i>   | This study |
| <i>sec3-913pub3Δ</i>   | <i>sec3-913-V5(::NAT) pub3::G418 leu1-32 ura4-D18 ade6</i>   | This study |
| <i>sec3-913pib1Δ</i>   | <i>sec3-913-V5(::NAT) pib1::G418 leu1-32 ura4-D18 ade6</i>   | This study |
| <i>sec3-913ubp2Δ</i>   | <i>sec3-913-V5(::NAT) ubp2::G418 leu1-32 ura4-D18 ade6</i>   | This study |
| <i>sec3-913ubp3Δ</i>   | <i>sec3-913-V5(::NAT) ubp3::G418 leu1-32 ura4-D18 ade6</i>   | This study |
| <i>sec3-913ubp6Δ</i>   | <i>sec3-913-V5(::NAT) ubp6::G418 leu1-32 ura4-D18 ade6</i>   | This study |
| <i>sec3-913uch2Δ</i>   | <i>sec3-913-V5(::NAT) uch2::G418 leu1-32 ura4-D18 ade6</i>   | This study |
| <i>pib1Δpub1Δ</i>      | <i>pib1::NAT pub1::G418 leu1-32 ura4-D18 ade6</i>            | This study |
| <i>ubp3Δuch2Δ</i>      | <i>ubp3::G418 uch2::ura4 leu1-32 ade6</i>                    | This study |

## SUPPLEMENTAL REFERENCES

1. Jourdain, I., Dooley, H. C., and Toda, T. (2012) Fission yeast sec3 bridges the exocyst complex to the actin cytoskeleton. *Traffic*. **13**, 1481-1495
2. Kriegenburg, F., Jakopec, V., Poulsen, E. G., Nielsen, S. V., Roguev, A., Krogan, N., Gordon, C., Fleig, U., and Hartmann-Petersen, R. (2014) A chaperone-assisted degradation pathway targets kinetochore proteins to ensure genome stability. *PLoS. Genet.* **10**, e1004140
3. Paraskevopoulos, K., Kriegenburg, F., Tatham, M. H., Rosner, H. I., Medina, B., Larsen, I. B., Brandstrup, R., Hardwick, K. G., Hay, R. T., Kragelund, B. B., Hartmann-Petersen, R., and Gordon, C. (2014) Dss1 Is a 26S Proteasome Ubiquitin Receptor. *Mol. Cell* **56**, 453-461
4. Kim, D. U., Hayles, J., Kim, D., Wood, V., Park, H. O., Won, M., Yoo, H. S., Duhig, T., Nam, M., Palmer, G., Han, S., Jeffery, L., Baek, S. T., Lee, H., Shim, Y. S., Lee, M., Kim, L., Heo, K. S., Noh, E. J., Lee, A. R., Jang, Y. J., Chung, K. S., Choi, S. J., Park, J. Y., Park, Y., Kim, H. M., Park, S. K., Park, H. J., Kang, E. J., Kim, H. B., Kang, H. S., Park, H. M., Kim, K., Song, K., Song, K. B., Nurse, P., and Hoe, K. L. (2010) Analysis of a genome-wide set of gene deletions in the fission yeast *Schizosaccharomyces pombe*. *Nat. Biotechnol.* **28**, 617-623
5. Ikai, N. and Yanagida, M. (2006) Cdc48 is required for the stability of Cut1/separase in mitotic anaphase. *J. Struct. Biol.* **156**, 50-61
6. Stone, M., Hartmann-Petersen, R., Seeger, M., Bech-Otschir, D., Wallace, M., and Gordon, C. (2004) Uch2/Uch37 is the major deubiquitinating enzyme associated with the 26S proteasome in fission yeast. *J. Mol. Biol.* **344**, 697-706
